# Blazing Signature Filter: a library for fast pairwise similarity comparisons

Joon-Yong Lee<sup>1</sup>, Grant M. Fujimoto<sup>1</sup>, Ryan Wilson<sup>1</sup>, H. Steven Wiley<sup>2</sup>, Samuel H. Payne<sup>1\*</sup>

**1** Integrative Omics, Pacific Northwest National Laboratory, Richland, WA, USA

**2** Environmental Molecular Sciences Laboratory, Pacific Northwest National Laboratory, Richland, WA, USA

\* Corresponding author

E-mail: samuel.payne@pnl.gov (SHP)

# Abstract

Identifying similarities between datasets is a fundamental task in data mining and has become an integral part of modern scientific investigation. Whether the task is to identify co-expressed genes in large-scale expression surveys or to predict combinations of gene knockouts which would elicit a similar phenotype, the underlying computational task is often a multi-dimensional similarity test. As datasets continue to grow, improvements to the efficiency, sensitivity or specificity of such computation will have broad impacts as it allows scientists to more completely explore the wealth of scientific data. A significant practical drawback of large-scale data mining is that the vast majority of pairwise comparisons are unlikely to be relevant, meaning that they do not share a signature of interest. It is therefore essential to efficiently identify these unproductive comparisons as rapidly as possible and exclude them from more time-intensive similarity calculations. The Blazing Signature Filter (BSF) is a highly efficient pairwise similarity algorithm which enables extensive data mining within a reasonable amount of time. The algorithm transforms datasets into binary metrics, allowing it to utilize the computationally efficient bit operators and provide a coarse measure of similarity. As a result, the BSF can scale to high dimensionality and rapidly filter unproductive pairwise comparison. Two bioinformatics applications of the tool are presented to demonstrate the ability to scale to billions of pairwise comparisons and the usefulness of this approach.

# Introduction

Data mining is frequently used in scientific research for hypothesis generation, mechanistic insight, or validation. Similarity metrics are an essential component of data mining, and are used to identify relevant data. In computational biology, a wide variety of similarity metrics have been devised to maximize specificity and sensitivity in sequences alignment [1], proteomic mass spectrometry [2], evolutionary tree building [3], co-expression network creation [4], etc. These algorithms are typically used to facilitate comparing a data point against a curated library of experiments, which can lead to insight [5]. As modern data generation capabilities have created a deluge of potential data to compare against, exhaustive similarity search may become computationally prohibitive for inefficient algorithms. Therefore, efficient and accurate algorithms for computing similarity are necessary. For instance, the library of integrated network-based cellular signatures (LINCS) program has generated over one million gene expression experiments [6]. To compute the pairwise similarity between all experiments therefore requires 0.5 trillion similarity calculations.

When doing similarity-based computations on very large data, a significant drawback is that most of the pairwise comparisons yield a negative result, i.e. the two data points are not similar. An example of this is sequence alignment of genomic data. The current NCBI nr database contains > 78 million proteins (as of January 2017, release 80), the vast majority of which are not related to an input query. It would be a significant waste of time to perform the Smith-Waterman local alignment search against all 78 million sequences [7]. To overcome this limitation and enable large-scale data mining, sequence comparison algorithms commonly filter the set of sequences in the library prior to a more sensitive search. The BLAST algorithm requires a shared k-mer between the query sequence and candidate sequences from the library [8]. Only those proteins which contain

a shared k-mer progress to a full alignment. This style of filtering candidates before a more computationally expensive scoring scheme is a common strategy which allows data mining to scale to ever-larger data volumes [9–11].

A second method to improve the speed of an algorithm is to adopt a faster core calculation. Most scientific data is stored as floating-point numbers; multiplication or division of floats is relatively slow. Therefore, optimizing an approach to minimize these will improve the computational speed. Bit operations (e.g. AND, OR, XOR) are dramatically faster than multiplication, yet require a restructuring of the basic approach or a data transform. The FastBit algorithm transforms data into bitmaps, then performs a hybrid compression to enable several common algorithmic operations (e.g. less than operator, histograms, exact pattern matching). This method is specifically designed to facilitate querying very large libraries with scientific data of high cardinalities [12]. Similarly, bit-vectors have been used to improve the speed of string matching [13].

We combine these two ideas in the Blazing Signature Filter (BSF), a new approach to prune unproductive pairwise similarity calculations and enable large-scale data mining. The BSF identifies signatures in digital data through bit representation (non-full precision) and bitwise operators. These binary operands are dramatically more efficient than floating-point multiplication and division in terms of CPU cycles per comparison. This simple heuristic allow us to remove > 98% of pairwise comparisons rapidly and therefore concentrate computational effort on pairs that are more likely to be meaningfully similar, enabling data mining tasks which previously appeared infeasible. We demonstrate the power of the BSF by computing the pairwise similarity of all publicly available LINCS datasets and identifying similarity of all genomes annotated by the Kyoto Encyclopedia of Genes and Genomes (KEGG).

## Results

Mining large data repositories to identify similar datasets is a common technical task. Depending on the number of comparisons to be done, the time involved in this simple task may be prohibitive. In most large-scale pairwise similarity searches (e.g., identifying similarity between all public transcriptomics datasets), the vast majority of pairs will be dissimilar. Thus, the most efficient way to speed such data mining explorations is to rapidly identify dissimilar pairs and remove them from the analysis pipeline. The purpose of the BSF is to identify pairwise similarity comparisons which are unlikely to be statistically meaningful. Our heuristic is to binarize the data and calculate a similarity metric on the binary data using bit operators, as bitwise computation is dramatically faster than floating point operations. In this way, the BSF can work as a front-end filter to computational analysis tools and dramatically speed up their pipeline.

## Algorithm description

A simplified example of the BSF is illustrated in Fig 1, where a 64 element signature is compared to a pool of candidates in a library. This 64 element signature is entirely binary, meaning that we only keep track of whether the element is part of the signature or not. Bit operations on two 64-bit binary signatures happen in a single instruction as two registers are compared with operators like AND, or XOR. Counting the number of successes in the comparisons (1s in the resulting array) is rapidly done using the hardware instruction ‘POPCNT’ [14]. In comparison, identifying the cosine similarity or Euclidean distance between two 64 element floating point vectors requires over 100 additions, multiplications, divisions and square root operations. For modern processors, cosine distance and euclidean distance have an average latency of 524~538 and 711~725 clock cycles, respectively, whereas BSF uses 4 clock cycles. Although this simplified

example shows a 64 element signature, the software implementation of the BSF 113  
has been engineered to allow an arbitrary signature length. This is essential for 114  
comparing gene expression signatures which may scale to tens of thousands of 115  
elements, e.g. 20,000 human proteins. As this is larger than the size of a single 116  
CPU register, the data is chunked into appropriate sizes and comparisons are 117  
flowed through the registers. 118

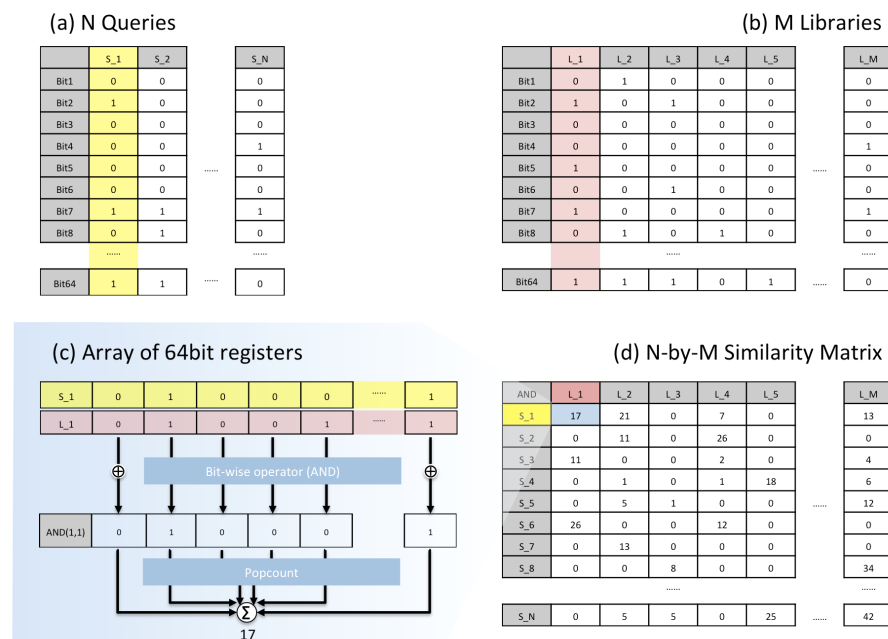

**Fig 1. Illustration for the core of BSF.** This simple example shows how the BSF deals with the binary data to identify the similarity between query and library signatures. Each signature has 64 elements (rows in the matrix). The binary data represents whether an element is part of the signature, i.e. ‘1’ means that the element is part of the signature, ‘0’ means that it is not part of the signature. (a) A set of query signatures represented as a binary matrix. (b) A set of library signatures to which the query signatures are compared. (c) The binary comparison for a single column in the query and library matrices. (d) The results matrix containing the similarity for each pairwise comparison. In the 64-bits example, clock cycle needs for the BSF are 1 for ‘AND’ and 3 for ‘POPCNT’, while cosine and euclidean metric use > 500 and > 700 clock cycles, respectively. (See Methods).

# Performance benchmarking

To demonstrate the speed of the similarity metrics, we performed a benchmark test of BSF, cosine similarity and Euclidean distance using a synthetic dataset mimicking gene expression measurements. In gene expression experiments, the goal is often to identify the up/down regulated genes relative to a reference condition. For example, in a gene knockout experiment, the desire is to understand and investigate which proteins are altered in their regulation relative to wild-type. The synthetic data was generated as measurements of 20,000 genes for 15,000 experiments (See Methods). Full precision floating point data was used by cosine and Euclidean distance metrics, whereas the BSF used binarized data showing up or down regulated genes.

We performed the full pairwise comparison of all 15K experiments for both the up and down matrix (~225 million comparisons). To characterize the time-dependence of each algorithm on the length of the signature, we tested each algorithm with a different number of genes ranging from 1,000 to 20,000. This is essential to understanding the utility of each algorithm, as different applications may contain highly variable signature lengths. As shown in Fig 2, the time taken by each algorithm grows with the length of the signature. However, we note that the time dependence of the BSF grows dramatically more slowly than other methods. For the full 20,000 length signature (approximately what would be used for human gene expression data), the BSF algorithm ran in 45 seconds, while Euclidean and cosine methods took ~2,000 or ~6,000 seconds respectively. Both the Euclidean and cosine method show a linear time dependence on the signature length,  $O(n)$ , while the BSF shows a log-linear dependence,  $O(\log n)$ , consistent with algorithmic expectations.

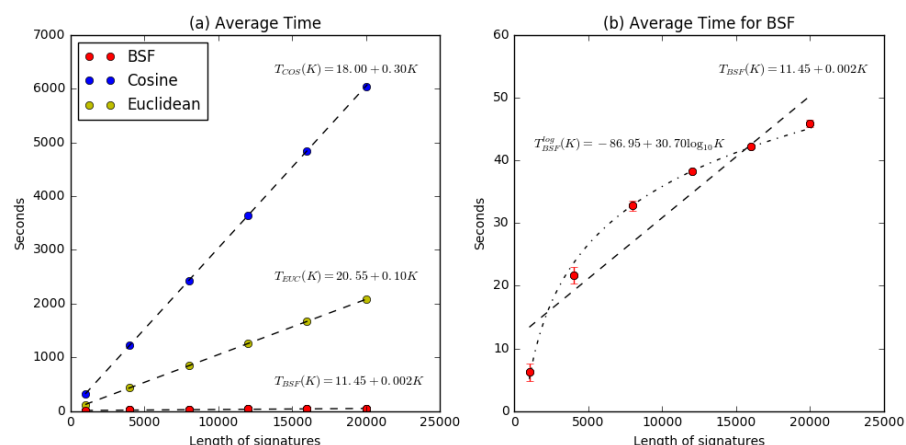

**Fig 2. Benchmark result of BSF.** (a) shows the average running time of computing each metric.  $T_{COS}(K)$ ,  $T_{EUC}(K)$ ,  $T_{BSF}(K)$  indicate the linear functions to fit the time points in terms of K of cosine similarity, euclidean distance, and BSF, respectively, where K means the length of each signature. (b) is a zoomed portion of (a) to focus on the BSF. (b) shows the BSF has a logarithmic time complexity while others have a linear time complexity. Refer to Methods and

[https://github.com/PNNL-Comp-Mass-Spec/BSF\\_publication](https://github.com/PNNL-Comp-Mass-Spec/BSF_publication).

## LINCS Network analysis

The LINCS L1000 project is a large-scale gene expression analysis, where numerous perturbations are applied to a variety of human cell lines and the response measured at multiple time points (<https://clue.io/>). The L1000 assay acquires transcript measurements on  $\sim 1,000$  carefully chosen landmark genes followed by imputing the expression values for the remaining  $\sim 21,000$  human genes. Perturbations used in the LINCS L1000 project include small molecule inhibitors, gene knockdowns and gene over-expression. Identifying similarities between perturbations is a primary focus of the project, and the goal is to enable the characterization of drug compounds having unknown targets as well as to identify signaling cross-talk and other gene expression changes induced by the perturbations.

As a real-world test for the BSF, we computed the pairwise similarity for



the publicly available subset of the LINCS L1000 datasets [6]. We downloaded the December 2016 snapshot which contains 117K signatures as differentially expressed genes calculated using the characteristic direction method. We convert the up/down regulated genes into a 22,688-by-117,373 binary matrix and computed the 6.89 billion pairwise comparisons for the up-regulated genes and another 6.89 billion comparisons for the down-regulated genes. Results from these were merged to show the number of up/down regulated genes shared between two experiments. Supplementary Figure 1 shows that 98.8% of all pairs shared less than 10 up/down regulated genes. By spending about 2 hours determining this lack of pattern similarity using the BSF, accurate distances did not need to be calculated for these unproductive pairs, thus saving 9.6 days of computation.

After computing all pairwise comparisons within the LINCS dataset, we built a network connectivity graph to identify similar signatures of gene expression among the various perturbations. In exploring this graph, we first examined perturbations using small molecule histone deacetylase (HDAC) inhibitors. We queried the network using nine well-known HDAC inhibitors (belinostat, entinostat, mocetinostat, pracinostat, trichostatin A, vorinostat, rocilinostat, HDAC6 inhibitor ISOX, and valproic acid), which generated a sub-network of 1,066 nodes and 6.3 million edges. Fig 3 shows the network of the top 500 connections. Each node and its size indicate a perturbation dataset and the number of up/down-regulated genes by each perturbation. The weight of an edge shows the similarity score between two nodes. This analysis revealed that the nodes clustered by cell line rather than drug, indicating the response to various HDAC inhibitors is more cell line-specific than drug-specific. In addition to the query perturbations, six additional drug treatments were also found to show a similar signature and thus form part of the sub-network. Among these six are known or

putative HDAC inhibitors such as HC toxin [15], panobinostat [16] and scriptaid, one of the first HDAC inhibitors discovered via high-throughput screening [17]. THM-I-94 had previously been hypothesized to act as an HDAC inhibitor based on structural similarity [18], and its clustering here supports that assertion. Other small molecules which cluster with the HDAC inhibitors include unnamed or poorly characterized pharmacological agents. With respect to the differential gene expression pattern shared by these drug treatments, we found enrichment in pathways associated with the cell cycle, MAPK signaling and KEGG's Pathways in Cancer network based on the Fisher's exact test.

A second data mining example from LINCS investigates the effect on human cell lines of non-human medication. Niclosamide is used to treat tapeworm infestations, but has recently been explored as a treatment for MRSA and Zika virus [19, 20]. With the capability of BSF, we can easily find the most similar treatments in the LINCS dataset. As shown in Supplementary Figure 2, 257 experiments of 20 different drugs form a subnetwork with niclosamide. Even though it wasn't designed to target human cells, niclosamide has strong connectivity with IMD-0354, which is an  $IKK\beta$  inhibitor and blocks  $I\kappa B\alpha$  phosphorylation. In addition to their high concordance in affecting the NF- $\kappa$ B pathway (Supplementary Figure 2b), the two signatures have very high overlap in KEGG's cell cycle pathway, with both showing strong down regulation of cyclins, cyclin dependent kinases, checkpoint kinases and the MCM complex (Supplementary Figure 2c).

## Whole genome similarity

A second application of the BSF is to compare gene content across a large number of genomes. Sequenced genomes are functionally annotated both by sequence repositories for inclusion in RefSeq [21] or Uniprot [22], or they can be

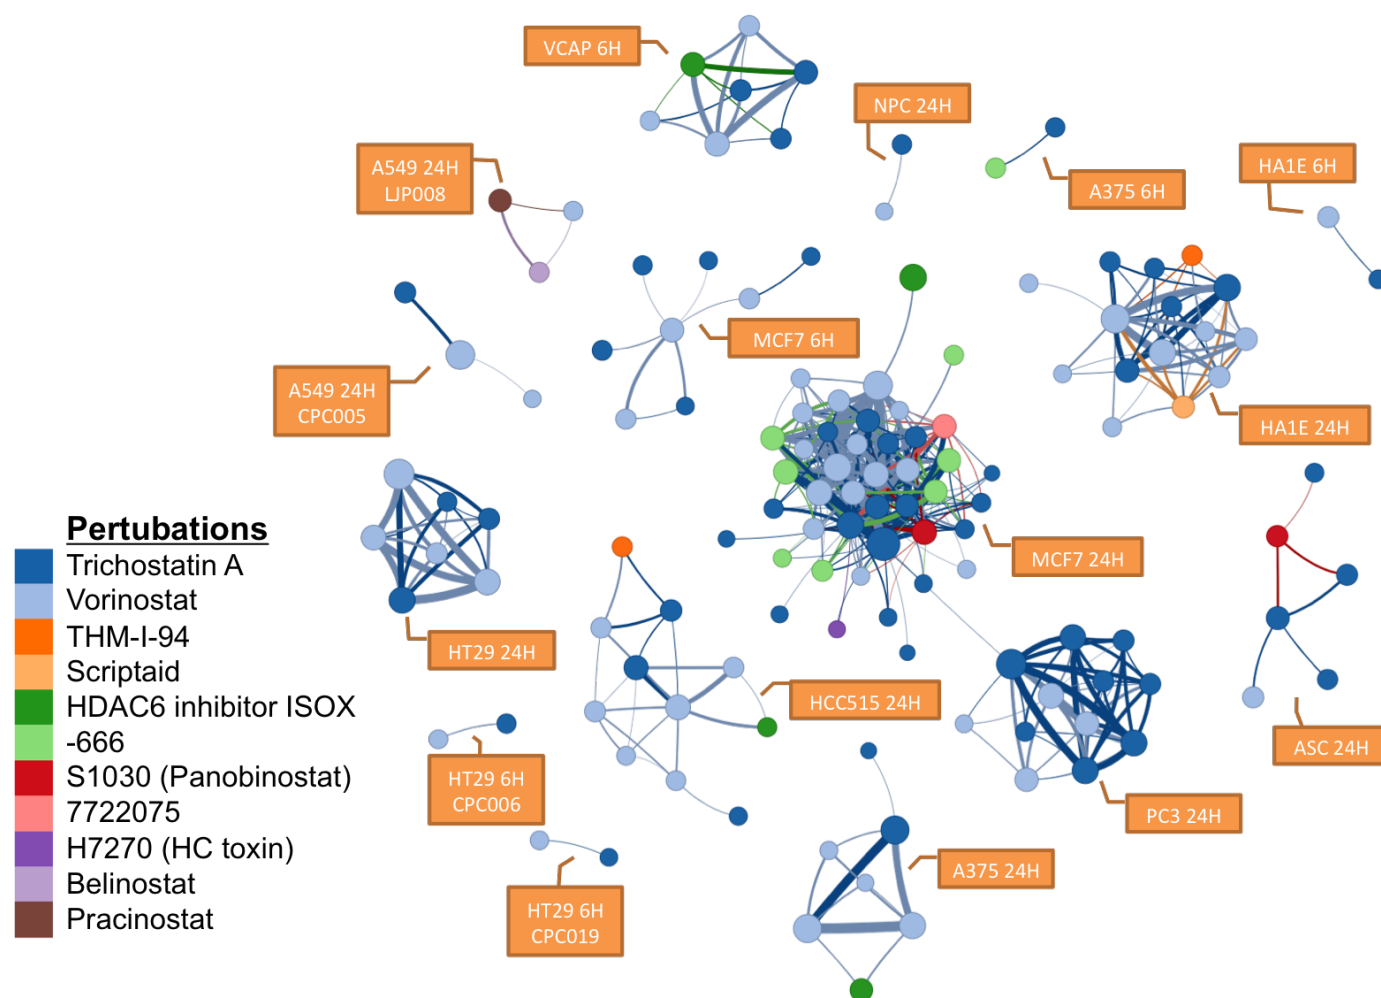

**Fig 3. A sub-network associated to known HDAC inhibitors.** The top 500 edges (among 6.3 million) are shown which includes the perturbations from the query (belinostat, pracinostat, trichostatin A, vorinostat, and HDAC6 inhibitor ISOX) and other compounds, some of which are known (scriptaid) and putative (THM-I-94) HDAC inhibitors. H7270 and S1030 are catalog numbers for HC toxin and panobinostat, both recognized HDAC inhibitors. Other perturbation are unnamed drugs (See Methods). The networks naturally form tight clusters, mostly distinguished by cell type and time point. The line width represents its similarity score between two nodes.

annotated by a variety of systems biology style knowledgebases like KEGG [23] 210  
or RAST [24]. At the advent of genome sequencing, large scale comparisons of all 211  
genomes was used to understand protein function and evolution [25]. As genome 212  
sequencing technology has improved, the number of publicly available genomes 213

grows dramatically and an all versus all comparison is much less frequently done  
due to computational costs.

KEGG is a functional annotation system which organizes whole genomes  
into into pathways and molecular interactions for 20,624 protein orthologs in  
4,648 organisms (356 eukaryotes, 4,049 bacteria, and 243 archaea). Annotated  
genes are identified by their KEGG ortholog number, which are used to define  
metabolic, signaling and information pathways. Using the BSF, we computed  
the functional similarity between all genomes annotated by KEGG. Because gene  
presence/absence is already a binary measure, genome similarity comparisons are  
a simple and natural use for the BSF. We prepare the binary matrix consisting of  
20,624 rows (orthologs) by 4,648 columns (genomes) where each cell represents  
where whether a ortholog is present in a genome. Computation for the full  
pairwise comparison took 5.2 seconds.

To show the diversity of genomic content within a taxonomic grouping, we  
plotted the average number of shared genes between genomes within a taxonomic  
group, e.g. *Homo sapiens* compared to all vertebrates (Fig 4). Eukaryotic  
genomes are generally larger than genomes of bacteria and archaea, and therefore  
it is not surprising to find a higher number of shared genes among eukaryotes.  
Additionally, KEGG contains a significant number of orthologs annotated in  
human disease pathways, and therefore the number of shared genes among  
animals is notably higher than among plants. We note that there is a broad  
range of similarity within a taxonomic group, most of which appears to be  
driven by genome size. For example, within alphaproteobacteria, most organisms  
share between 500-1100 orthologs. There are, however a few which share < 140  
genes. These are 4 different strains of *Candidatus Hodgkinia cicadicola* (See  
Materials and Methods), an endosymbionts of the cicada, which has a tiny 144  
kb genome [26]. To look at the comparisons within a taxonomic division, we

plotted the average similarity between all genera within the class Bacilli (Fig 5).  
Many genera within Lactobacillales have very low similarity to all other genera  
of Bacilli. Some of this can be due to low gene counts (e.g. Weissella), however,  
several have high self-similarity but very low average overlap with any other taxa  
(e.g. Streptococcus, Leuconostoc, Melissococcus). Thus they likely represent an  
adaptive genomic response to unique environmental niche.

Most organisms which share a small number of genes with other organisms  
are genome reduced and live as obligate symbionts. To compare the functions  
retained by genome reduced organisms, we plotted the similarity between organ-  
isms which had fewer than 600 genes annotated by KEGG (Fig 6). The lack  
of similarity between these minimalist genomes points to the wide variety of  
possible adaptations to environmental conditions. This is even true for para-  
sites/pathogens which have nominally similar environments: e.g. Chlamydia  
and Mycoplasma both infect humans, Coxiella and Borrelia are both tick borne  
pathogens infecting humans.

## Discussion

As technologies for scientific data generation continue to dramatically improve  
and facilitate an ever greater characterization and description of the natural  
world, data mining for hypothesis generation and validation becomes both more  
important and more technically challenging. With the BSF, we introduce a  
simple and efficient method for identifying patterns, or signatures, in massive  
amounts of data. This is enabled by the rapid pairwise comparison of data as  
binary vectors. We show two example applications where pairwise comparisons  
are a common bioinformatics task: comparing genomes for similar gene content  
and identifying experiments with similar gene expression patterns. In both  
applications, the sheer number of comparisons would be time prohibitive without

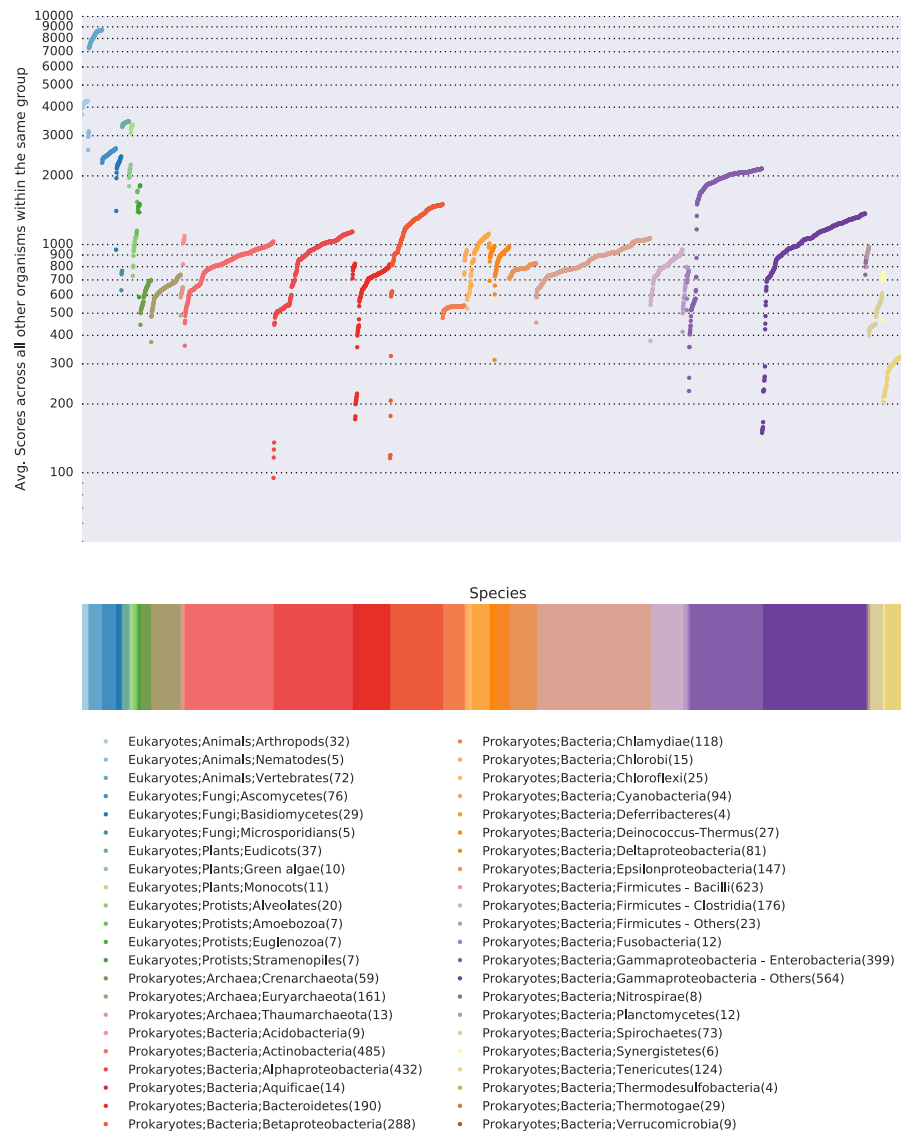

**Fig 4. The average number of shared genes across all the genomes.** Using protein orthologs from KEGG, we compare the gene presence/absence across all annotated genomes. Data points represent the average number of shared genes of a genome with the other genomes in the same taxonomic family. The graph is plotted on a log scale. Data points are colored according to taxonomic family membership. For clarity, taxonomic groups with fewer than four organisms were not plotted.

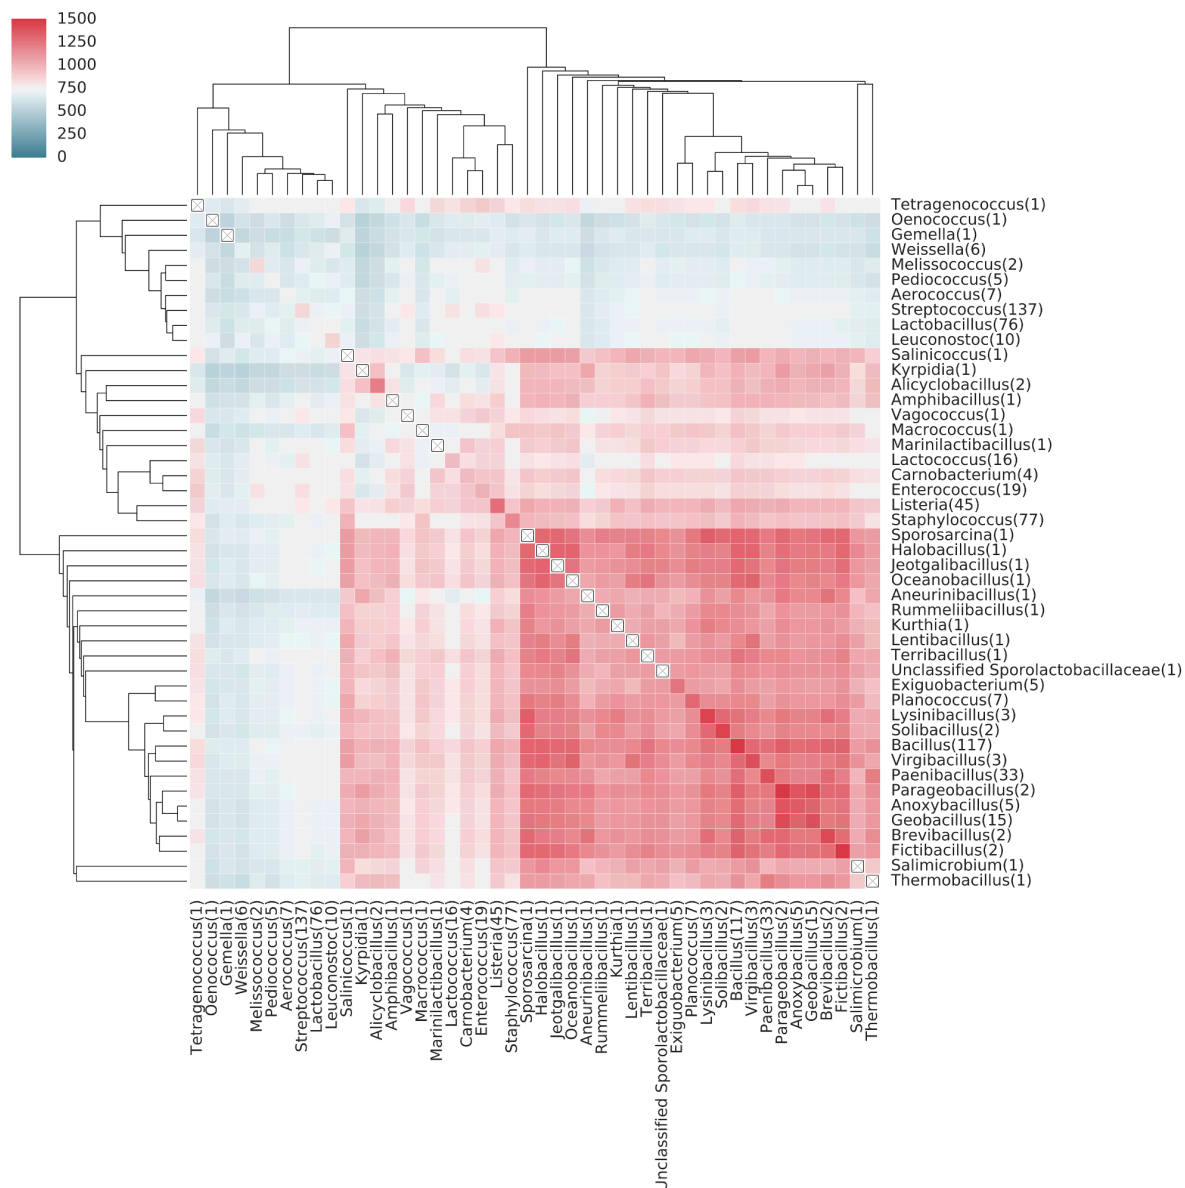

**Fig 5. The average number of shared genes in genera within the class Bacilli.** Rows and columns are ordered via hierarchical clustering. When only one sequenced member is present, the diagonal is marked with a boxed x. A number in the bracket of each label shows the number of species of each genus. For details, see Materials and Methods.

optimized computational methods such as the BSF.

267

New experimental technologies will improve the ability to make comprehensive

268

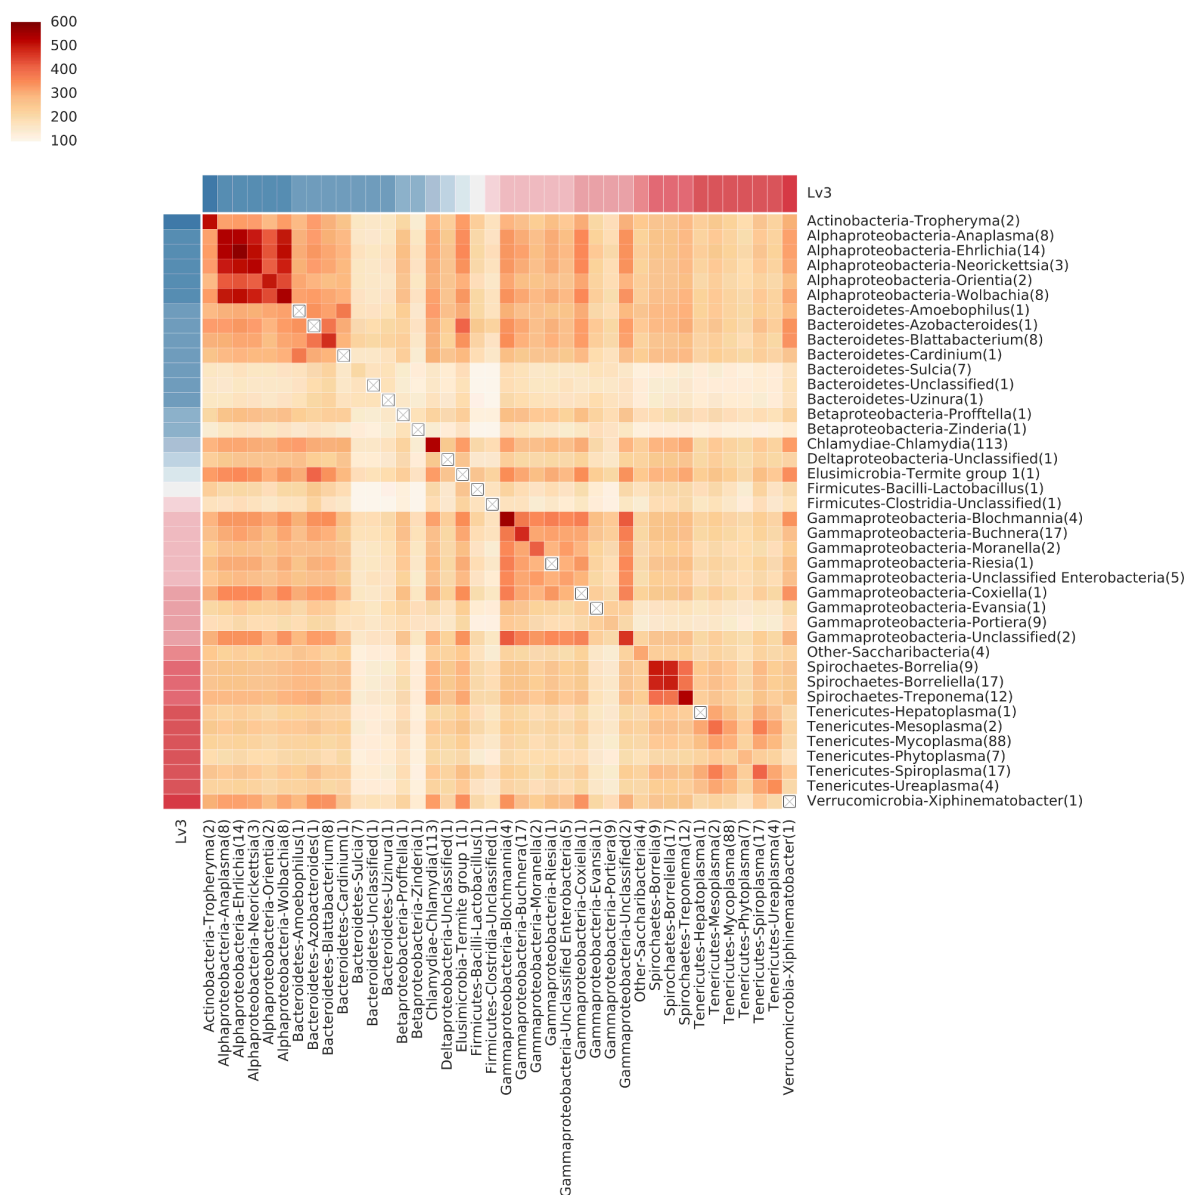

**Fig 6. The average number of shared genes between minimalist bacteria.** These organisms have 200-600 genes annotated by KEGG. Organisms are grouped by taxonomy.

datasets. For example, the task of identifying genetic interactions between pairs  
of genes was previously difficult to scale to whole genomes [27]. However, the  
CRISPR technology now makes is dramatically simpler to explore the effects of



multiple knockouts [28], and we anticipate that whole genome double knockouts will be common in the near future. Even for genomically compact bacteria with  $\sim 2000$  genes, the number of double knockouts exceeds millions of strains. The subsequent task of identifying similarity (or differences) between the millions of strains will then require trillions of calculations. In these scenarios, efficient similarity metrics like the BSF will be essential to enable scientific discovery.

For datasets that are natively binary (e.g. gene content), the BSF works trivially. Another computation that is inherently binary is the set overlap calculation that is part of a Fisher's exact test, commonly used for gene set enrichment. For datasets which are numeric or categorical, use of the BSF requires a meaningful transformation into binary space such as was done in the LINCS gene expression compendium. A wide variety of bioinformatics needs, e.g. proteomics library searches and FBA modeling, could benefit from using the BSF to quickly filter out unproductive data point prior to a more sensitive computation on the native (i.e. non-binary) data.

## Materials and Methods

The data and analysis methods for all figures are available at see [https://github.com/PNNL-Comp-Mass-Spec/BSF\\_publication](https://github.com/PNNL-Comp-Mass-Spec/BSF_publication).

## LINCS Application

The LINCS L1000 project measures gene expression (transcriptomics) over different cell lines with a broad range of small molecule perturbations and genetic manipulations (knockout, knockdown and over-expression) [29,30]. In this manuscript, we use the L1000 mRNA gene-expression signatures computed using the characteristic direction signatures method [6,29], giving binary up and down regulated genes for each of the  $\sim 117,000$  datasets. It is publicly available

at [http://amp.pharm.mssm.edu/public/L1000CDS\\_download/](http://amp.pharm.mssm.edu/public/L1000CDS_download/).

## KEGG Application

All Kegg annotations were taken from in Release 81.0 downloaded on January 1, 2017. A table of orthologs versus genomes was created and fed into the BSF using the python interface. See the kegg\_data section at [https://github.com/PNNL-Comp-Mass-Spec/BSF\\_publication](https://github.com/PNNL-Comp-Mass-Spec/BSF_publication) for auxiliary files and code.

## Benchmarking

The synthetic benchmarking data was created as a table ( $15K$  columns  $\times$   $20K$  rows) of floating point numbers drawn randomly from the gaussian distribution of  $N(0, 0.5)$ . Rows can be thought of as different gene measurements, and columns as distinct datasets. This continuous data was binarized into two tables to represent the extremes of the distribution, i.e. values  $< -0.6$  were written as 1 in a binary table representing the ‘low’ values and values  $> 0.6$  were written as 1 to a binary table representing high values.

We use the cosine distance and euclidean distance on the original floating point data to compare the performance with BSF. In the manuscript, we discussed clock cycles required for various operations. For a description of CPU clock cycles per instruction set, refer to [http://www.agner.org/optimize/instruction\\_tables.pdf](http://www.agner.org/optimize/instruction_tables.pdf). Supposing the  $M$ -by- $N$  signature matrix  $[S_1, S_2, S_3, \dots, S_N]$ , the formulae for cosine and Euclidean similarity are:

$$euclidean(S_i, S_j) = \sqrt{\sum_{k=1}^M (a_k - b_k)^2} \quad (1)$$

$$cosine(S_i, S_j) = \frac{s_i \cdot s_j}{|s_i||s_j|} = \frac{\sum_{k=1}^M a_k b_k}{\sqrt{\sum_{k=1}^M a_k^2} \sqrt{\sum_{k=1}^M b_k^2}} \quad (2)$$

, where  $S_i = [a_1, a_2, a_3, \dots, a_M]^T$  and  $S_j = [b_1, b_2, b_3, \dots, b_M]^T$  ( $i, j = 1, 2, 3, \dots, N$ ). 317  
318

## BSF Software and Access 319

The BSF code, written in C++, is an open source software project licensed under 320  
BSD. Source can be found at [https://github.com/PNNL-Comp-Mass-Spec/](https://github.com/PNNL-Comp-Mass-Spec/bsf-core) 321  
`bsf-core`. For ease of access, we have written a python wrapper to interface with 322  
the BSF C++ library, <https://github.com/PNNL-Comp-Mass-Spec/bsf-py>. 323  
Python extensions and numpy C-API are employed to implement the python 324  
wrapper. 325

The BSF is accessed through an API which ensures that input data is 326  
appropriate and meaningful, and interprets the output tables which are returned. 327  
Input to the BSF consists of two binary tables of size  $K$ -by- $N$  and  $K$ -by- $M$ . For 328  
the input table, all the bits of each column are stored into an array of 64-bit 329  
unsigned integers. It enables bitwise operators using the 64-bit registers. The 330  
user also specifies which binary operator to use. The return from BSF is an 331  
 $N$ -by- $M$  table with each cell representing the value of comparing element  $i$  in 332  
table 1 with element  $j$  in table 2. 333

As shown in Fig 1, the BSF outputs the  $N$ -by- $M$  matrix, where  $N$  and  $M$  334  
indicate the column sizes of  $K$ -by- $N$  and  $K$ -by- $M$  input matrices, respectively. 335  
The pseudocode is described in Algorithms 1. 336

In case to compute all the pairwise comparisons between two signatures 337  
within a  $K$ -by- $N$  library matrix, it outputs a  $N$ -by- $N$  strictly upper triangular 338  
matrix with zero diagonal entries so that we avoid the redundant computation 339  
of  $a_{ij}$  for  $i > j$  which must be equal to  $a_{ji}$ . The pseudo code for this looks as 340  
shown in Algorithms 2. 341

In case of LINC dataset, we need  $117K \times 117K \times 4\text{bytes} \approx 50G$  at least to 342

---

**Algorithm 1** BSF algorithm to analyse the similarity between columns of a library matrix and a query matrix

---

**Input:**  $lib[N_{row}][N_{col}] \leftarrow$  a library matrix,  $q[N_{row}][M_{col}] \leftarrow$  a query matrix

**Output:**  $out[N_{col}][M_{col}] \leftarrow$  a 2D array of unsigned integers

```

1: function BSFCORE1( $lib, q$ )
2:   for all  $i$  in  $[0, N_{col}]$  do
3:     for all  $j$  in  $[0, M_{col}]$  do
4:        $pop_{count} \leftarrow 0$ 
5:       for all  $k$  in  $[0, N_{row}]$  do
6:          $sim \leftarrow lib[k][i] \ \& \ q[k][j]$ 
7:          $pop_{count} \leftarrow pop_{count} + \_builtin\_popcountll(sim)$ 
8:        $out[i][j] \leftarrow count$ 
9:   return out

```

---



---

**Algorithm 2** BSF algorithm to analyse the similarity between columns of a single library matrix

---

**Input:**  $lib[N_{row}][N_{col}] \leftarrow$  a 2D array of unsigned 64bit integers

**Output:**  $out[N_{col}][N_{col}] \leftarrow$  a 2D array of unsigned integers

```

1: function BSFCORE2( $lib$ )
2:   for all  $i$  in  $[0, N_{col} - 1]$  do
3:     for all  $j$  in  $[i + 1, N_{col}]$  do
4:        $pop_{count} \leftarrow 0$ 
5:       for all  $k$  in  $[0, N_{row}]$  do
6:          $sim \leftarrow lib[k][i] \ \& \ lib[k][j]$ 
7:          $pop_{count} \leftarrow pop_{count} + \_builtin\_popcountll(sim)$ 
8:        $out[i][j] \leftarrow count$ 
9:   return out

```

---

save all the results. As a data size gets larger, this may lead to an out-of-memory  
exception depending on the physical memory size. To safely avoid this memory  
issue, we split the output matrix into multiple chunks, of which size is reasonably  
manageable. Given the file size, the size of a chunk matrix is decided. Details  
are described in Algorithms 3.

---

**Algorithm 3** Chunk split for avoiding out-of-memory in handling a big library matrix

---

**Input:**

$lib[N_{row}][N_{col}] \leftarrow$  a library matrix,  
 $size \leftarrow$  the chunk size (GB, e.g., 4 for 4GB)

**Output:** multiple binary files of which size is less than  $s_{chunk}$

```

1:  $s_{chunk} \leftarrow \text{int}(\sqrt{size \times 10^9/4})$  ▷
   (e.g.,  $\sqrt{4 \times 10^9 \text{ bytes}/4 \text{ bytes}} \approx 31,623$  for splitting into 4GB chunks)
2:  $tail \leftarrow N_{col} \pmod{s_{chunk}}$ 
3:  $N_{chunk} \leftarrow \text{tail} = 0 ? (N_{col}/s_{chunk}) : (N_{col}/s_{chunk}) + 1$ 
4: for all  $i$  in  $[0, N_{chunk}]$  do
5:   for all  $j$  in  $[i, N_{chunk}]$  do
6:     if  $i < N_{chunk} - 1$  then
7:        $rows \leftarrow s_{chunk}$ 
8:     else
9:        $rows \leftarrow \text{tail} = 0 ? s_{chunk} : \text{tail}$ 
10:    if  $j < N_{chunk} - 1$  then
11:       $cols \leftarrow s_{chunk}$ 
12:    else
13:       $cols \leftarrow \text{tail} = 0 ? s_{chunk} : \text{tail}$ 
14:     $x1 \leftarrow i * s_{chunk}, x2 \leftarrow i * s_{chunk} + rows$ 
15:     $y1 \leftarrow j * s_{chunk}, y2 \leftarrow j * s_{chunk} + cols$ 
16:     $chunk[rows][cols] \leftarrow$  An empty matrix
17:    if  $i = j$  then
18:       $chunk \leftarrow \text{BSFCORE2}(lib[N_{row}][x1 : x2])$ 
19:    else
20:       $chunk \leftarrow \text{BSFCORE1}(lib[N_{row}][x1 : x2], lib[N_{row}][y1 : y2])$ 
21:    Write  $chunk[rows][cols]$  into a binary file
```

---

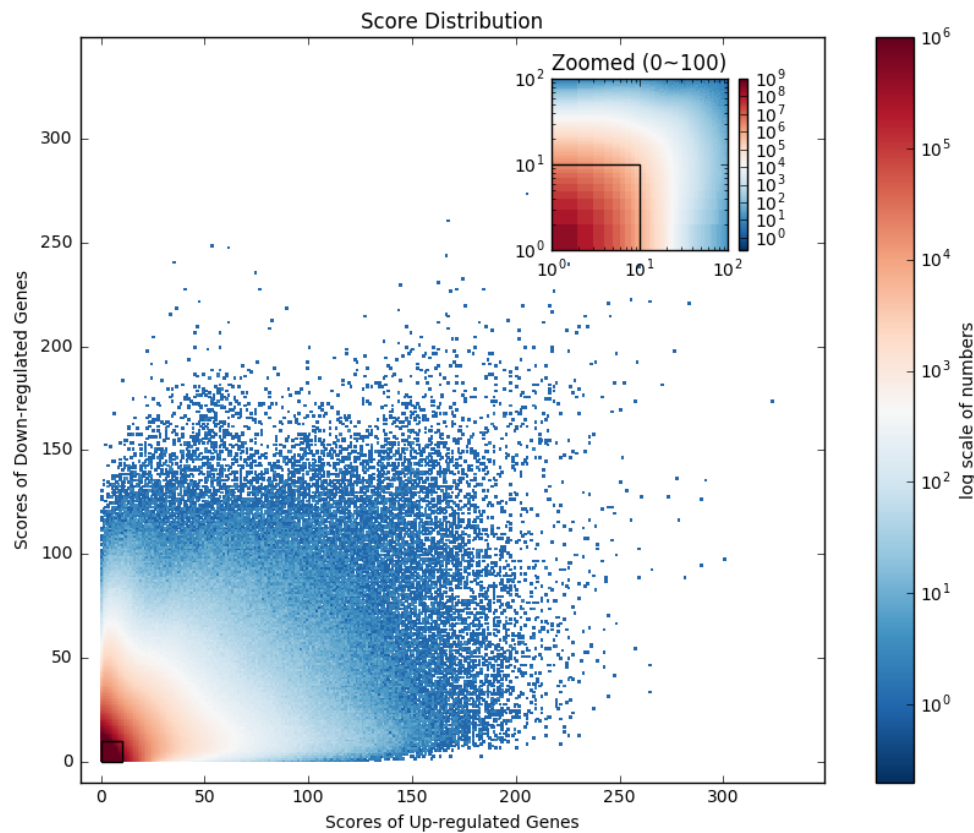

**Supplementary Figure 1. Score distribution of the 6.89 billion pairwise comparisons in the LINCS L1000 dataset.** The color of each point describes the number of pairs which have shared genes. X and Y axes indicate the number of shared up-regulated genes and down-regulated genes, respectively. For example, a point of (50, 50) has 147, which means 147 pairs of two signatures share 50 up-regulated genes and 50 down-regulated genes. The overwhelming majority of pairwise comparisons,  $\sim 6.80$  billions or 98.8%, are located in a small box of up-regulated genes  $< 10$  and down-regulated genes  $< 10$ . These represent pairs of experiments, which do not share a discernable signature of regulated gene expression and are unproductive data mining events.

## Supporting information

348

## Acknowledgements

349

This work was supported by the National Cancer Institute (NCI) CPTAC award U24 CA210972 (SHP), and the U.S. Department of Energy, Office of Science, Office of Biological and Environmental Research, Pan-omics Program. Battelle

operates the Pacific Northwest National Laboratory for the DOE under contract DE-AC05-76RLO01830.

## References

1. Henikoff S, Henikoff JG. Amino acid substitution matrices from protein blocks. *Proc Natl Acad Sci U S A*. 1992;89(22):10915–9.
2. Nesvizhskii AI, Keller A, Kolker E, Aebersold R. A statistical model for identifying proteins by tandem mass spectrometry. *Anal Chem*. 2003;75(17):4646–58.
3. Saitou N, Nei M. The neighbor-joining method: a new method for reconstructing phylogenetic trees. *Mol Biol Evol*. 1987;4(4):406–25.
4. Stuart JM, Segal E, Koller D, Kim SK. A gene-coexpression network for global discovery of conserved genetic modules. *Science*. 2003;302(5643):249–55. doi:10.1126/science.1087447.
5. Lamb J, Crawford ED, Peck D, Modell JW, Blat IC, Wrobel MJ, et al. The Connectivity Map: using gene-expression signatures to connect small molecules, genes, and disease. *Science*. 2006;313(5795):1929–35. doi:10.1126/science.1132939.
6. Duan Q, Reid SP, Clark NR, Wang Z, Fernandez NF, Rouillard AD, et al. L1000CDS2: LINCS L1000 characteristic direction signatures search engine. *NPJ Syst Biol Appl*. 2016;2:16015. doi:10.1038/npjbsa.2016.15.
7. Smith TF, Waterman MS. Identification of common molecular subsequences. *J Mol Biol*. 1981;147(1):195–7.

8. Altschul SF, Gish W, Miller W, Myers EW, Lipman DJ. Basic local alignment search tool. *J Mol Biol.* 1990;215(3):403–10. doi:10.1016/S0022-2836(05)80360-2.
9. Kent WJ. BLAT—the BLAST-like alignment tool. *Genome Res.* 2002;12(4):656–64. doi:10.1101/gr.229202. Article published online before March 2002.
10. Frank A, Tanner S, Bafna V, Pevzner P. Peptide sequence tags for fast database search in mass-spectrometry. *J Proteome Res.* 2005;4(4):1287–95. doi:10.1021/pr050011x.
11. Tabb DL, Saraf A, Yates r J R. GutenTag: high-throughput sequence tagging via an empirically derived fragmentation model. *Anal Chem.* 2003;75(23):6415–21. doi:10.1021/ac0347462.
12. Wu K, Ahern S, Bethel EW, Chen J, Childs H, Cormier-Michel E, et al. FastBit: interactively searching massive data. *Journal of Physics: Conference Series.* 2009;180(1):012053.
13. Myers G. A fast bit-vector algorithm for approximate string matching based on dynamic programming. *Journal of the Acm.* 1999;46(3):395–415. doi:Doi 10.1145/316542.316550.
14. Haque IS, Pande VS, Walters WP. Anatomy of high-performance 2D similarity calculations. *J Chem Inf Model.* 2011;51(9):2345–51. doi:10.1021/ci200235e.
15. Walton JD. HC-toxin. *Phytochemistry.* 2006;67(14):1406–13. doi:10.1016/j.phytochem.2006.05.033.
16. Ellis L, Pan Y, Smyth GK, George DJ, McCormack C, Williams-Truax R, et al. Histone deacetylase inhibitor panobinostat induces clinical responses



- p>with associated alterations in gene expression profiles in cutaneous T-cell lymphoma. Clin Cancer Res. 2008;14(14):4500–10. doi:10.1158/1078-0432.CCR-07-4262.
17. Su GH, Sohn TA, Ryu B, Kern SE. A novel histone deacetylase inhibitor identified by high-throughput transcriptional screening of a compound library. Cancer Res. 2000;60(12):3137–42.
18. Siavelis JC, Bourdakou MM, Athanasiadis EI, Spyrou GM, Nikita KS. Bioinformatics methods in drug repurposing for Alzheimer’s disease. Brief Bioinform. 2016;17(2):322–35. doi:10.1093/bib/bbv048.
19. Xu M, Lee EM, Wen Z, Cheng Y, Huang WK, Qian X, et al. Identification of small-molecule inhibitors of Zika virus infection and induced neural cell death via a drug repurposing screen. Nat Med. 2016;22(10):1101–1107. doi:10.1038/nm.4184.
20. Rajamuthiah R, Fuchs BB, Conery AL, Kim W, Jayamani E, Kwon B, et al. Repurposing salicylanilide anthelmintic drugs to combat drug resistant Staphylococcus aureus. PLoS One. 2015;10(4):e0124595. doi:10.1371/journal.pone.0124595.
21. Pruitt KD, Tatusova T, Brown GR, Maglott DR. NCBI Reference Sequences (RefSeq): current status, new features and genome annotation policy. Nucleic Acids Res. 2012;40(Database issue):D130–5. doi:10.1093/nar/gkr1079.
22. UniProt C. UniProt: a hub for protein information. Nucleic Acids Res. 2015;43(Database issue):D204–12. doi:10.1093/nar/gku989.
23. Kanehisa M, Goto S. KEGG: kyoto encyclopedia of genes and genomes. Nucleic Acids Res. 2000;28(1):27–30.

24. Aziz RK, Bartels D, Best AA, DeJongh M, Disz T, Edwards RA, et al. The RAST Server: rapid annotations using subsystems technology. *BMC Genomics*. 2008;9:75. doi:10.1186/1471-2164-9-75.
25. Tatusov RL, Galperin MY, Natale DA, Koonin EV. The COG database: a tool for genome-scale analysis of protein functions and evolution. *Nucleic Acids Res*. 2000;28(1):33–6.
26. McCutcheon JP, McDonald BR, Moran NA. Origin of an alternative genetic code in the extremely small and GC-rich genome of a bacterial symbiont. *PLoS Genet*. 2009;5(7):e1000565. doi:10.1371/journal.pgen.1000565.
27. Tong AH, Evangelista M, Parsons AB, Xu H, Bader GD, Page N, et al. Systematic genetic analysis with ordered arrays of yeast deletion mutants. *Science*. 2001;294(5550):2364–8. doi:10.1126/science.1065810.
28. Boettcher M, Tian R, Blau J, Markegard E, Wu D, Biton A, et al. Decoding directional genetic dependencies through orthogonal CRISPR/Cas screens. *bioRxiv*. 2017;doi:10.1101/120170.
29. Clark NR, Hu KS, Feldmann AS, Kou Y, Chen EY, Duan Q, et al. The characteristic direction: a geometrical approach to identify differentially expressed genes. *BMC Bioinformatics*. 2014;15:79. doi:10.1186/1471-2105-15-79.
30. Liu C, Su J, Yang F, Wei K, Ma J, Zhou X. Compound signature detection on LINCS L1000 big data. *Mol Biosyst*. 2015;11(3):714–22. doi:10.1039/c4mb00677a.

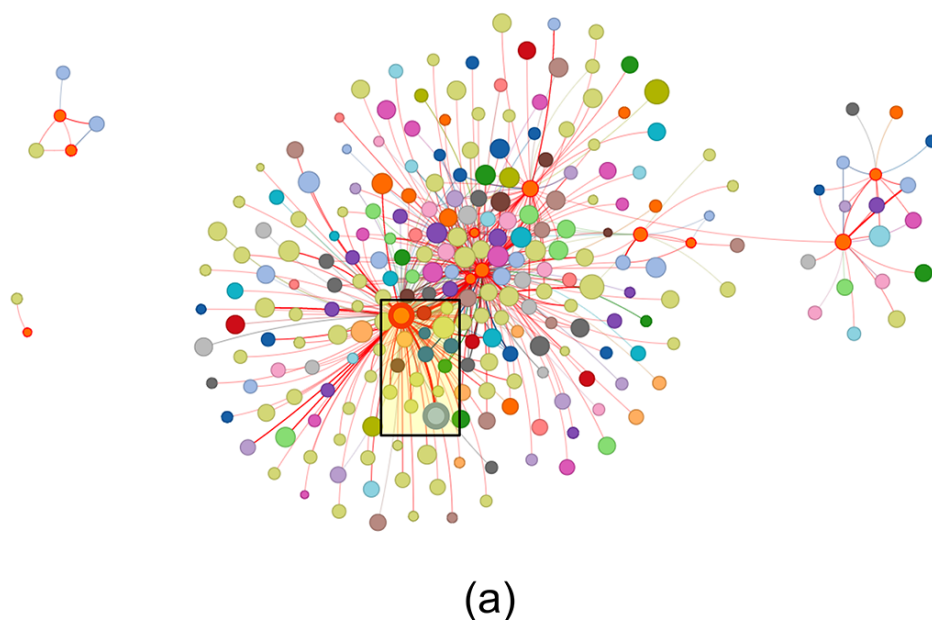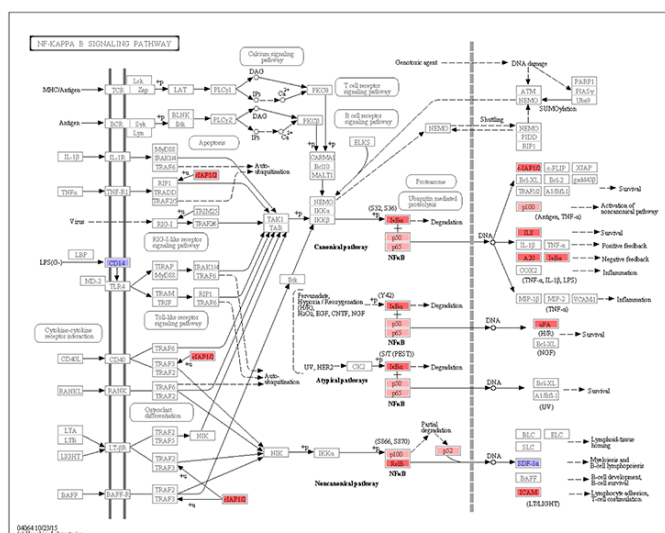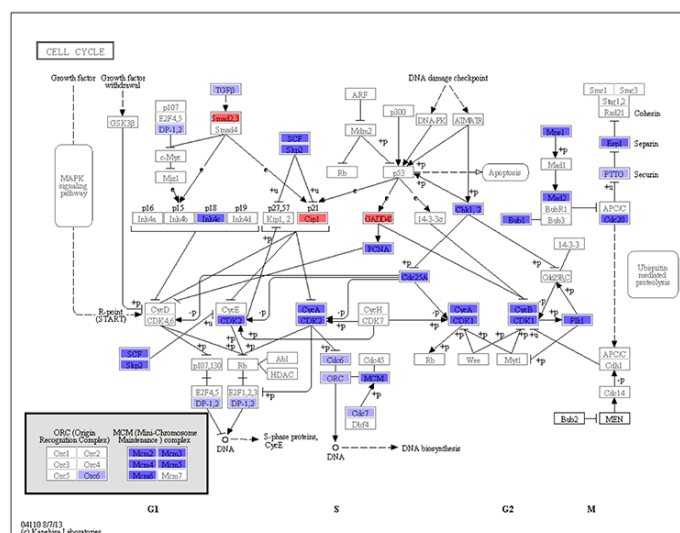

**Supplementary Figure 2. A sub-network of LINCS L1000 experiments most similar to niclosamide.** (a) We extracted the network for 88 datasets associated with non-human medications such as niclosamide (tapeworm infestations) and daminozide (plant growth regulator). It shows 257 experiments of 20 drugs highly connected to these 88 signatures. Refer to Materials and Methods for details. (b) Differentially expressed genes shared between niclosamide and IMD 0354, an IKK $\beta$  inhibitor. Most of all common genes are down-regulated and cell cycle looks slow down. (c) Shared differential genes shown for the NF- $\kappa$ B signaling pathway; most of the genes are up-regulated.
